# Supplementary material
Source: publisher figshare collection journal article supplement (https://acs.figshare.com/ndownloader/files/4196440)
Supplement: Supplementary file 1 [file 4196440]

# Supplementary Information for "Real Time Indirect Nanoplasmonic in situ Spectroscopy of Catalyst Nanoparticle Sintering"

Elin M. Larsson<sup>1,3,4</sup>, Julien Millet<sup>1</sup>, Stefan Gustafsson<sup>2</sup>, Magnus Skoglundh<sup>3</sup>,  
Vladimir P. Zhdanov<sup>1,5</sup> and Christoph Langhammer<sup>1,4</sup>

<sup>1</sup>*Division of Chemical Physics, <sup>2</sup>Division of Microscopy and Microanalysis,  
Department of Applied Physics, Chalmers University of Technology,  
412 96 Göteborg, Sweden*

<sup>3</sup>*Competence Center for Catalysis, Chalmers University of Technology,  
412 96 Göteborg, Sweden*

<sup>4</sup>*Insplorion AB, Stena Center 1C, 412 96 Göteborg, Sweden*

<sup>5</sup>*Boriskov Institute of Catalysis Russian Academy of Sciences,  
Novosibirsk 630090, Russia*

## 1. Stability of a blank INPS sensor in 4% O<sub>2</sub> at 610 °C

Figure S1 comprises a control experiment where a blank INPS sensor (i.e., Au nanoparticles, covered by a SiO<sub>2</sub> layer, without Pt nanoparticles) is exposed to oxidizing atmosphere as during a sintering experiment. Clearly, no significant shift of the centroid occurs during the entire 6-hour exposure. This measurement is thus another very strong indicator that the measured centroid shifts in oxidizing atmosphere with Pt nanoparticles on the INPS sensor clearly and directly are related to the sintering of the Pt catalyst and not to an interaction with the environment of the sensor itself.

## 2. Sintering kinetics

Figure S2 shows how the calculated (from  $\Delta\lambda$ ) particle-diameter changes as a function of time during exposure to oxidizing atmosphere at four different temperatures, i.e. during the sintering process. The shown data are the ones used to generate the  $\log(D)$ - $\log(t)$  plot in Figure 6 in the main text.

## 3. Theoretical background

The kinetics of sintering of metal nanoparticles can be fitted by using the phenomenological equation for the average particle radius,

$$\frac{d\langle R \rangle}{dt} = \frac{A}{\langle R \rangle^{n-1}}, \quad (1)$$

where  $n$  and  $A$  are adjustable parameters. This equation yields  $\langle R \rangle^n = \langle R \rangle_\circ^n + nAt$ , or

$$\langle R \rangle = (\langle R \rangle_\circ^n + nAt)^{1/n}, \quad (2)$$

where  $\langle R \rangle_\circ$  is the initial value of the average radius. Asymptotically (at  $At \gg \langle R \rangle_\circ^n$ ), Eq. (2) predicts power-law growth,

$$\langle R \rangle \propto t^{1/n}. \quad (3)$$

This law was widely employed to fit and/or interpret experimental results.

Eqs. (1)-(3) are valid in the framework of the conventional models of the LSW type for Ostwald ripening and the models assuming the sintering to occur via nanoparticle diffusion (for the references, see the main text). The former models are based on the use of the Kelvin equation including surface energy or tension,  $\gamma$  (in our context, these terms can be employed interchangeably). Specifically, the conventional treatments are based on the assumption that  $2\gamma v/(k_B TR) \ll 1$ , where  $v$  is the atomic volume. For the metal nanoparticles under consideration, this condition does not hold. The Kelvin equation is, however, applicable and can be employed to scrutinize sintering kinetics as outlined below. At present, one can find more accurate treatments of the energetics of bare metal nanoparticles (see, e.g., Refs. [9] and [16] in the main text). In our case, the Pt particles are covered by oxide, and their shape is not well established. Under such circumstances, the use of more accurate equations is now hardly possible, because such equations are lacking.

Let us consider that the sintering of supported metal nanoparticles is kinetically limited and occurs via 2D detachment, surface diffusion, and attachment of metal atoms (in the metallic or oxidized state). In this case, the balance equation for the number of atoms,  $N$ , in a particle is

$$dN/dt = W_a - W_d, \quad (4)$$

where  $W_a$  and  $W_d$  are the attachment and detachment rate. To rewrite Eq. (1) in terms of the particle radius, we consider that the particle shape is close to hemispherical (for a truncated sphere, the analysis and final results are similar) and take into account that  $N = 2\pi R^3/(3v)$ , where  $2\pi R^3/3$  is the particle volume. Substituting this expression for  $N$  into Eq. (4) yields

$$\frac{2\pi R^2}{v} \frac{dR}{dt} = W_a - W_d. \quad (5)$$

According to the Kelvin equation, the contribution of the surface energy to the detachment activation energy is  $\Delta E = -2\gamma v/(k_B TR)$ , and accordingly the detachment rate can be represented as

$$W_d = \frac{2\pi R\nu}{a} \exp\left(-\frac{E_\circ - 2\gamma v}{k_B TR}\right), \quad (6)$$

where  $2\pi R/a$  is the number of metal atoms on the metal-support-gas interface ( $a = v^{1/3}$  is the atomic size), and  $E_o$  and  $\nu \simeq 10^{13} \text{ s}^{-1}$  are the main size-independent part of the activation energy and the pre-exponential factor for detachment, respectively.

The attachment rate is also proportional to  $2\pi R/a$  and can be calculated by using the detailed balance principle or, more specifically, taking into account that  $W_d$  and  $W_a$  should be nearly equal near the maximum of PSD, i.e., at  $R = \langle R \rangle$ . This condition yields

$$W_a = \frac{2\pi R\nu}{a} \exp\left(-\frac{E_o - 2\gamma v}{k_B T \langle R \rangle}\right). \quad (7)$$

Substituting (6) and (7) into (5) results in

$$\frac{dR}{dt} = \frac{B}{R} \left[ \exp\left(\frac{2\gamma v}{k_B T \langle R \rangle}\right) - \exp\left(\frac{2\gamma v}{k_B T R}\right) \right], \quad (8)$$

where  $B = a^2 \nu \exp(-E_o/k_B T)$ . The equations of this type were already used in the literature (see, e.g., Ref. [9] in the main text).

In the models of the LSW type, as already noted,  $2\gamma v/(k_B T R)$  is considered to be small, and the corresponding exponential functions [like those in Eq. (8)] are expanded as  $\exp(x) \simeq 1 + x$ . In our case, this expansion may fail. To get a better approximation, Eq. (8) can be rewritten as

$$\frac{dR}{dt} = \frac{B}{R} \exp\left(\frac{2\gamma v}{k_B T \langle R \rangle}\right) \left\{ 1 - \exp\left[\frac{2\gamma v}{k_B T} \left(\frac{1}{R} - \frac{1}{\langle R \rangle}\right)\right] \right\}. \quad (9)$$

Taking into account that for the main part of a PSD the argument of the second exponential function in Eq. (9) is appreciably smaller than that of the first one and expanding only the second exponential function, we obtain

$$\frac{dR}{dt} = \frac{A}{R^2} \exp\left(\frac{2\gamma v}{k_B T \langle R \rangle}\right) \left(\frac{R}{\langle R \rangle} - 1\right), \quad (10)$$

where  $A = 2\gamma v B / k_B T = (2\gamma a^5 \nu / k_B T) \exp(-E_o/k_B T)$ .

If the PSD during the growth is self-similar, the dimensionless ratio in the second parentheses (i.e.  $R/\langle R \rangle - 1$ ) in Eq. (10) remains constant inside the PSD, and the scale of the rate of the growth of the average radius is determined by the terms before those parentheses. Thus, the equation for  $\langle R \rangle$  can approximately be represented as

$$\frac{d\langle R \rangle}{dt} = \frac{A}{\langle R \rangle^2} \exp\left(\frac{2\gamma v}{k_B T \langle R \rangle}\right). \quad (11)$$

If  $2\gamma v/(k_B T R) \ll 1$ , the exponential function is here close to unity, and, as expected, this equation becomes equivalent to Eq. (1) with  $n = 3$ .

We have fitted our kinetics (see, e.g., Figure S3) by using Eq. (1) and considering  $A$  and  $n$  to be adjustable parameters. The corresponding exponent,  $n = 5$ , is found to be larger than those ( $n = 3$  or  $4$ ) predicted for 2D Ostwald ripening by the conventional models of the LSW type, and accordingly it could be interpreted as the process occurring via nanoparticle diffusion.

Alternatively, we have used Eq. (11) (see Figure S3 and Figure 6 in the main text) considering  $A$  and  $\gamma$  to be adjustable parameters. The suitable value of  $\gamma$  is found to be  $1.5 \text{ J/m}^2$ . As expected, this value is somewhat lower than the surface energy for Pt ( $2\text{--}3 \text{ J/m}^2$  [1,2]), because the detachment is facilitated by oxygen. Scrutinizing the temperature dependence of  $A$ , we have found that  $E_o = 364 \text{ kJ/mol}$ . As expected, this detachment activation energy is lower than the Pt sublimation energy ( $557 \text{ kJ/mol}$ ) for the same reason. For comparison, we mention that the detachment activation energy, obtained in studies of sintering of Au nanoparticles on  $\text{TiO}_2$ , is reported to be  $327 \text{ kJ/mol}$  (see Ref. [16] in the main text).

As noted in the main text, the fit by using Eq. (11) is preferable. Here, we add that the example shown in Figure S3 clearly indicates that the formal fit by employing the simplest power-law equation (1) may easily be misleading.

## References

- [1] Foiles, S.M., Baskes, M.I. & Daw, M.S., Embedded-atom-method functions for the fcc metals Cu, Ag, Au, Ni, Pd, Pt, and their alloys. *Physical Review B* **33**, 7983-7991 (1986).
- [2] Ibach, H., The role of surface stress in reconstruction, epitaxial growth and stabilization of mesoscopic structures. *Surface Science Reports* **29**, 193-263 (1997).

## Supplementary Figures

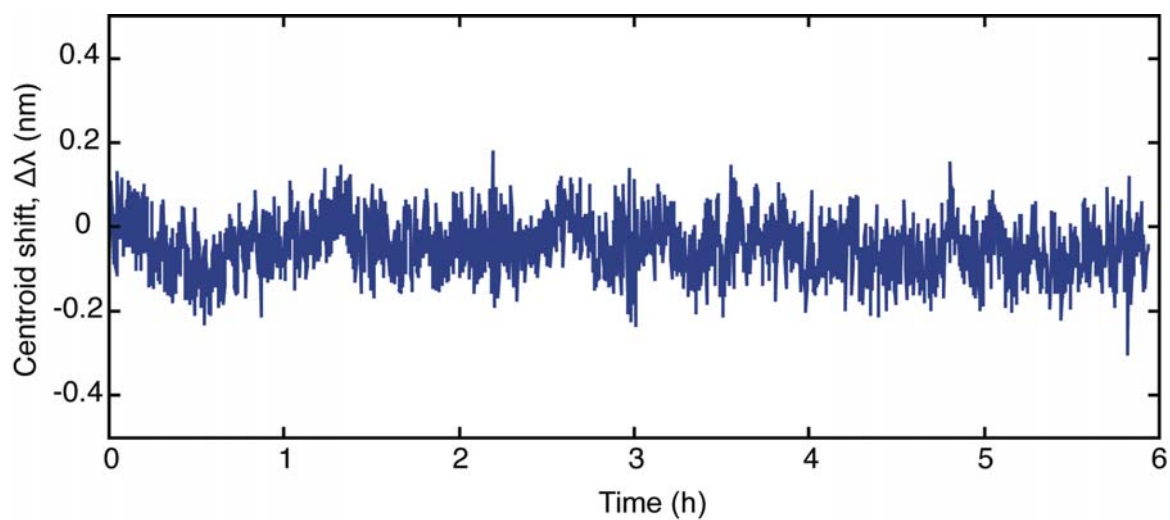

**Figure S1:** Centroid shift,  $\Delta\lambda$ , during 6 h exposure of a blank INPS sensor to 4%  $\text{O}_2$  in Ar at 610°C.

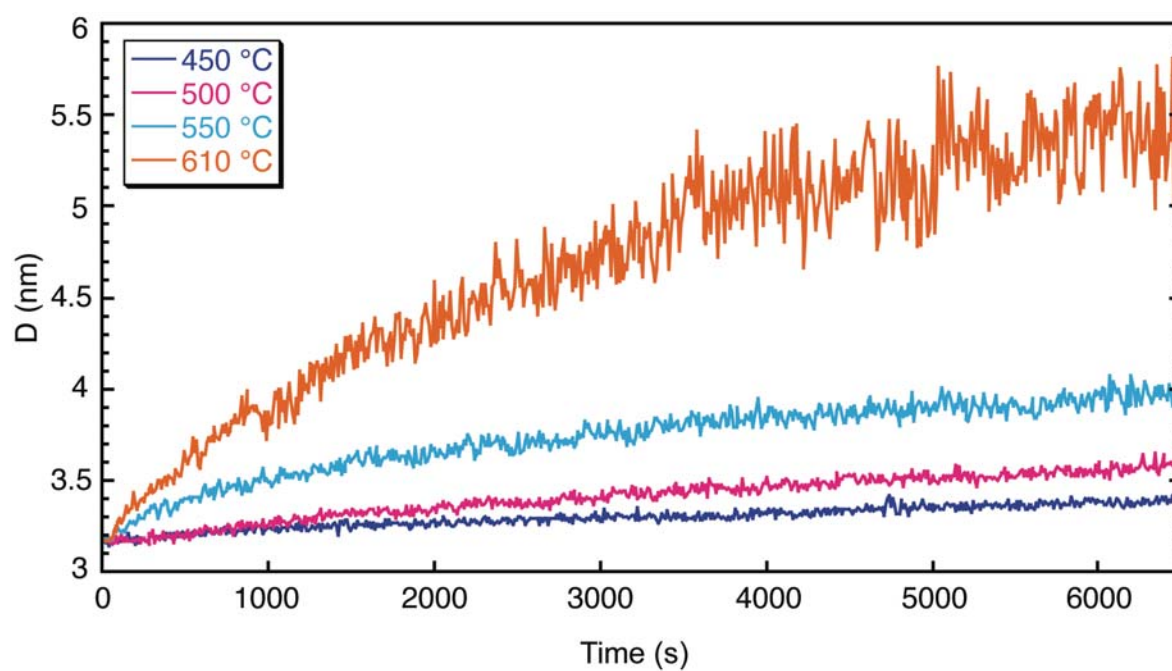

**Figure S2:** INPS Sintering kinetic curves for 4 different temperatures.

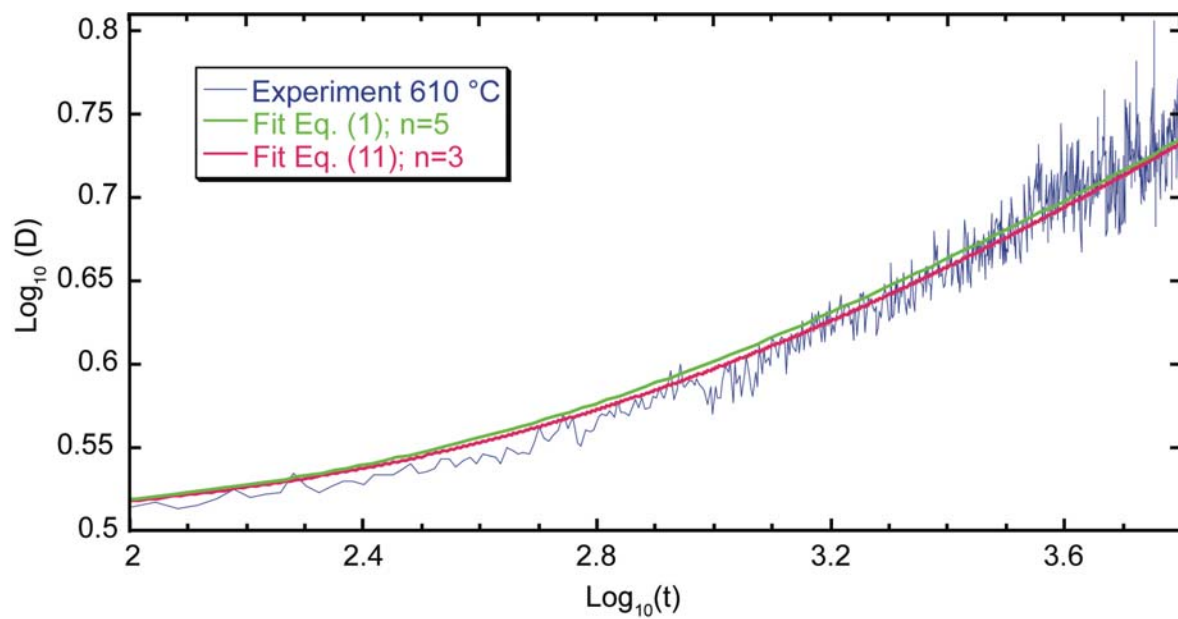

**Figure S3:** Quantitative analysis of INPS kinetics of Pt/SiO<sub>2</sub> sintering at 610 C. The upper (green) solid line shows the fit of the experimental data by using Eq. (1) with  $n=5$ . The lower (pink) solid line corresponds to the fit by employing Eq. (11) with  $n=3$ .
